# Supplementary material for: Effect of low-ratio n-6/n-3 PUFA on blood glucose: a meta-analysis
Source: Royal Society of Chemistry journal article supplement (doi:10.1039/c9fo00323a), 2019-01-01
Supplement: c9fo00323a1.pdf [file c9fo00323a1.pdf]

## Appendix 1

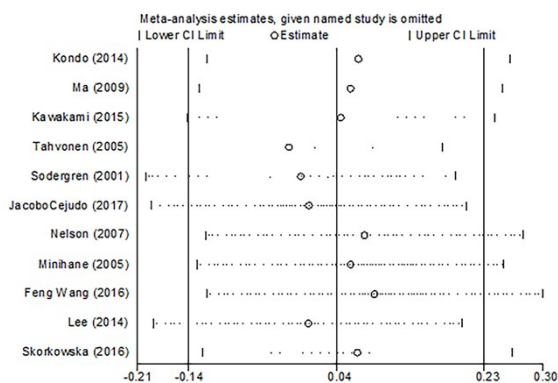

Fig. 1 Sensitivity analysis of fasting blood glucose

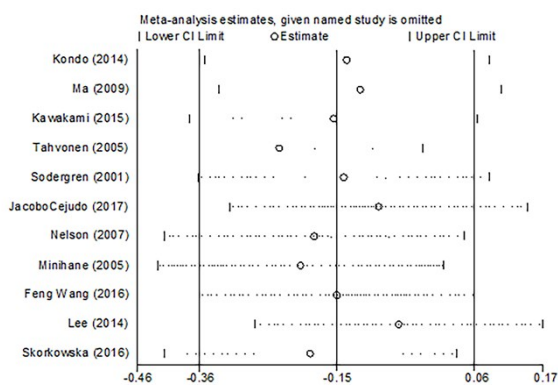

Fig. 2 Sensitivity analysis of fasting insulin

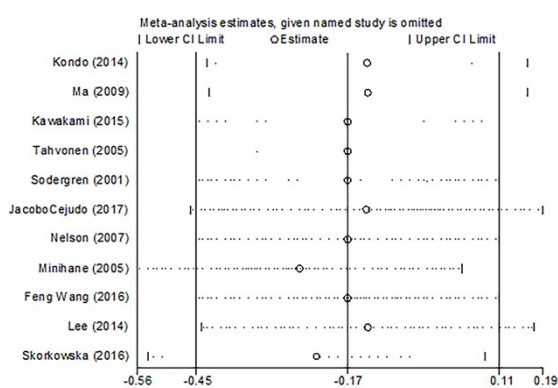

Fig. 3 Sensitivity analysis of insulin resistance index

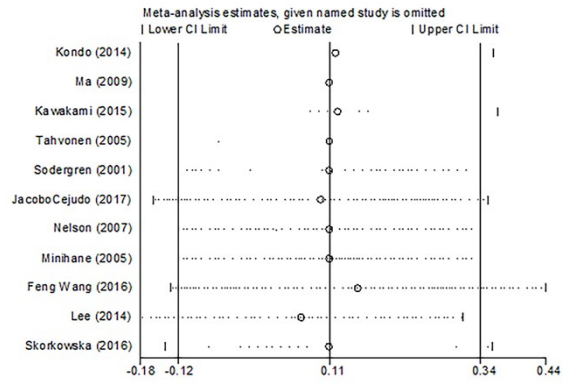

Fig. 4 Sensitivity analysis of glyated hemoglobin

## Appendix 2

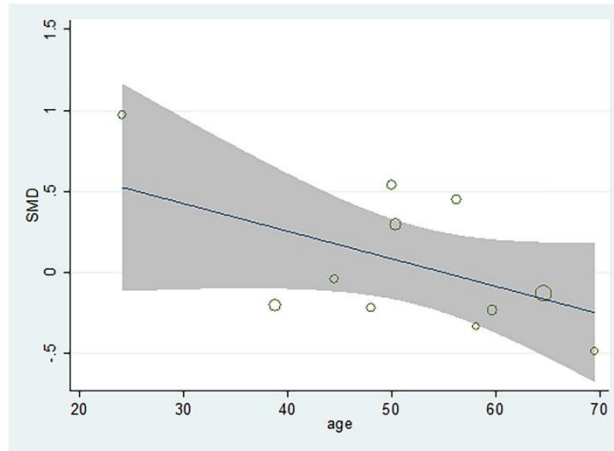

A: Regression analysis of age on fasting blood glucose

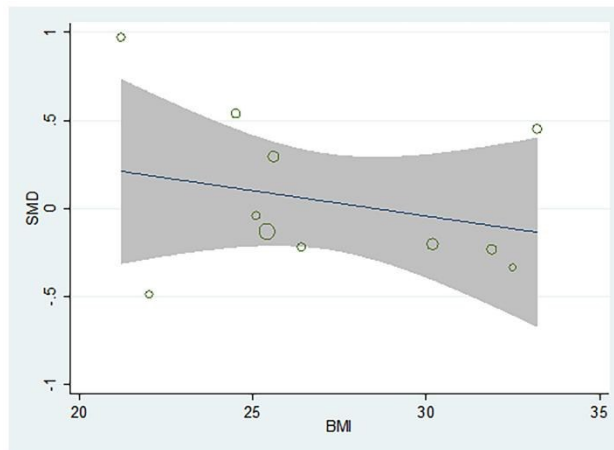

B: Regression analysis of BMI on fasting blood glucose

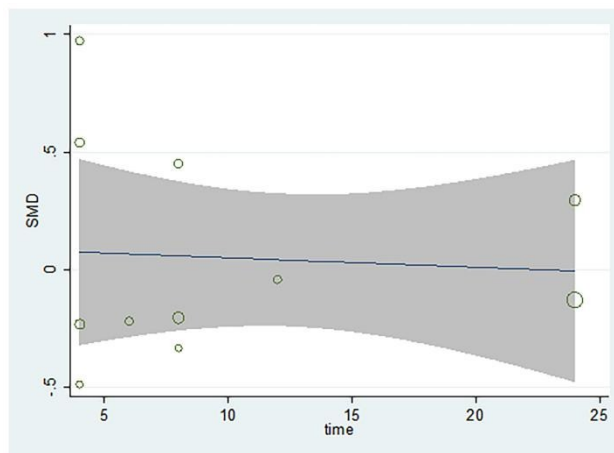

C: Regression analysis of intervention time on fasting blood glucose

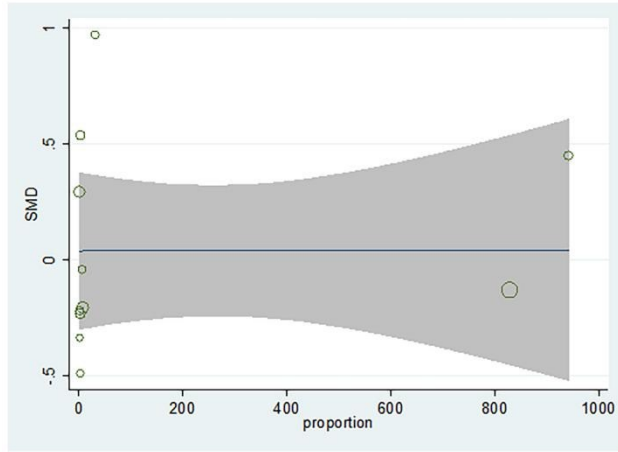

D: Regression analysis of proportion on fasting blood glucose

Fig. 1 meta-regression analyses of fasting blood glucose in different n-6/n-3 PUFA ratios

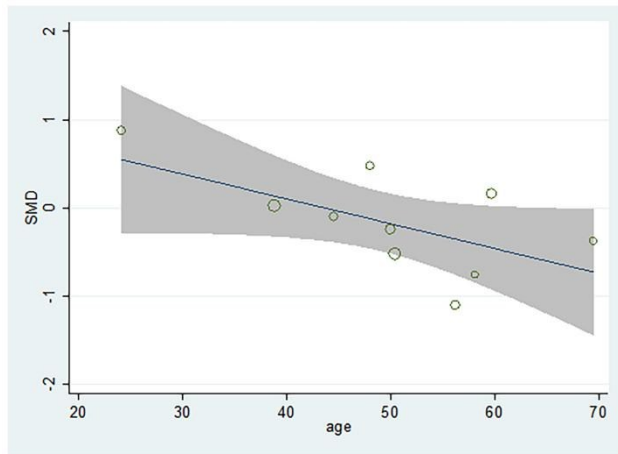

A: Regression analysis of age on fasting insulin

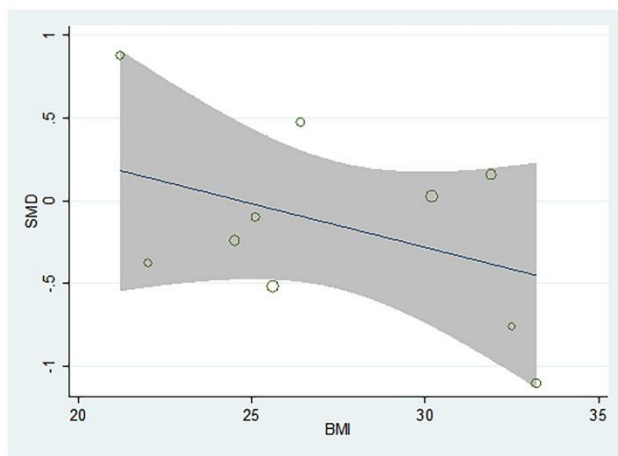

B: Regression analysis of BMI on fasting insulin

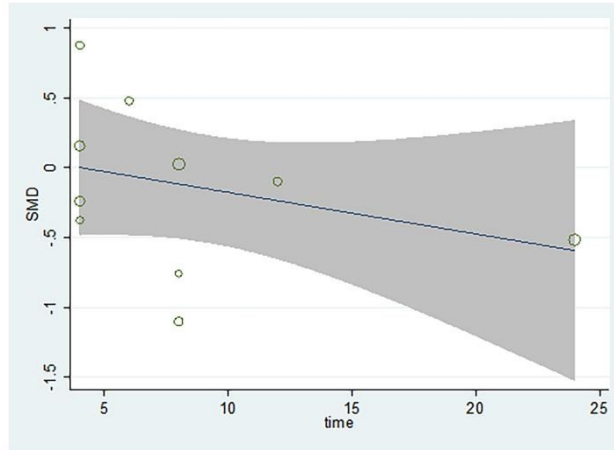

C: Regression analysis of intervention time on fasting insulin

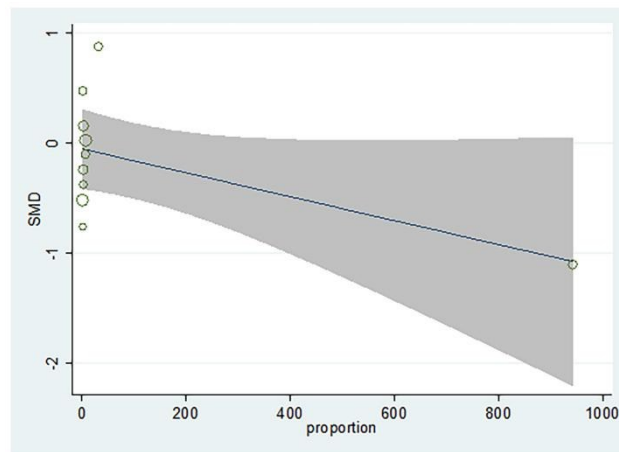

D: Regression analysis of proportion on fasting insulin

Fig. 2 meta-regression analyses of fasting insulin in different n-6/n-3 PUFA ratios  
 Proportion: the difference between two n-6/n-3 PUFA ratios of treatment and control groups is described as proportion, which is n-6/n-3 ratio in control group divide ratio in treatment group.

### Appendix 3

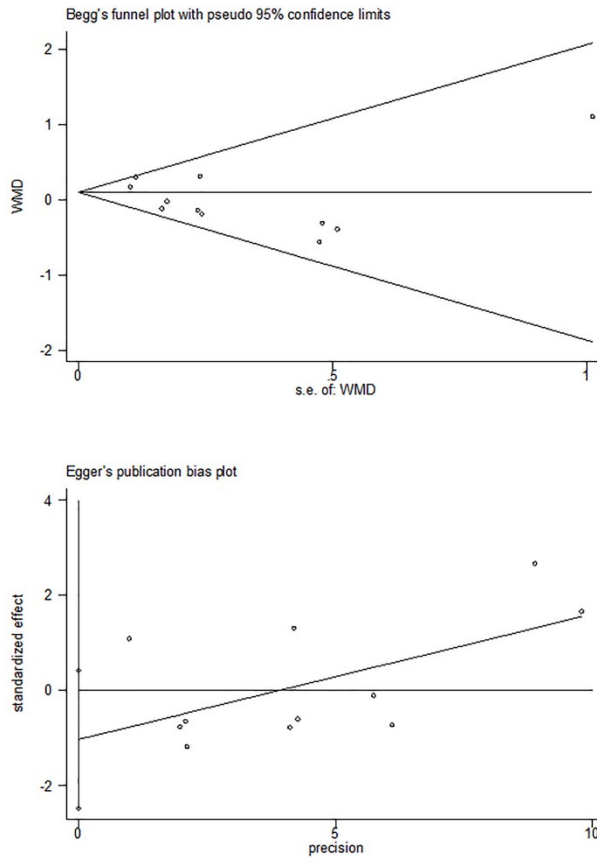

Fig. 1 The bias analysis of fasting glucose in different n-6/n-3 PUFA ratios

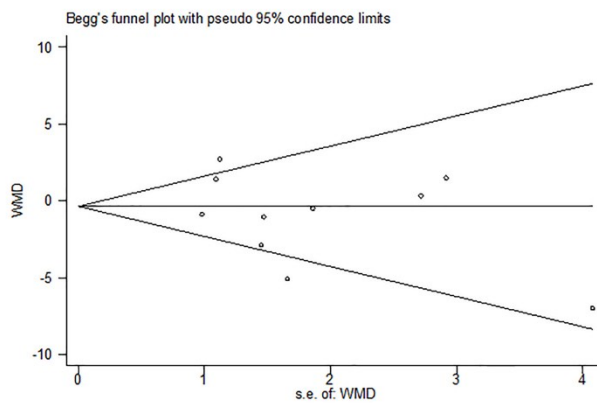

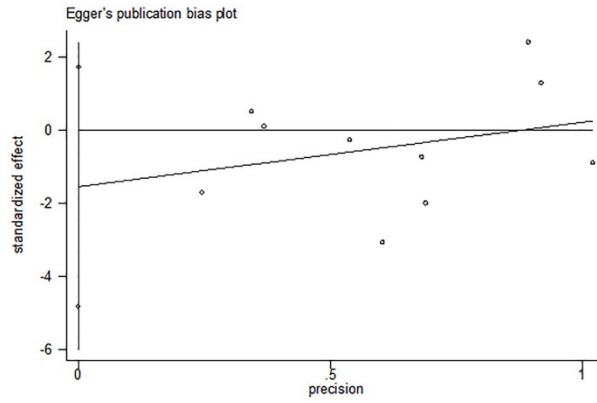

Fig. 2 The bias analysis of fasting insulin in different n-6/n-3 PUFA ratios

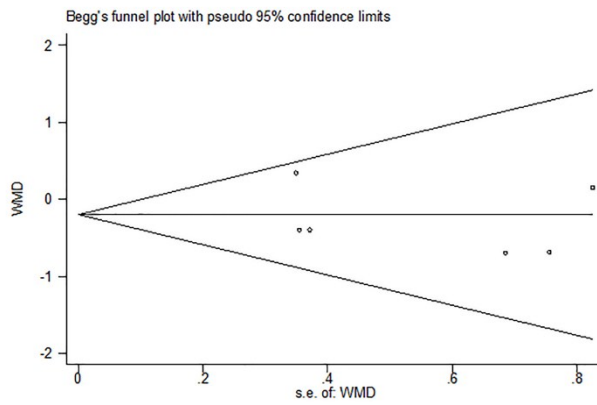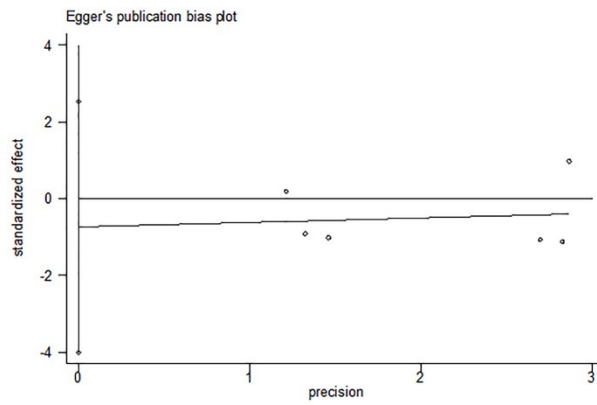

Fig. 3 The bias analysis of insulin resistance index in different n-6/n-3 PUFA ratios

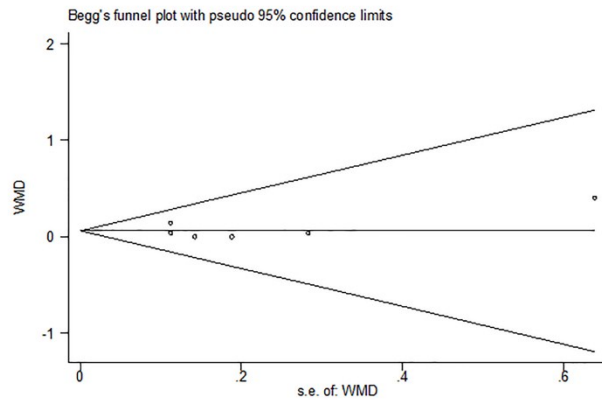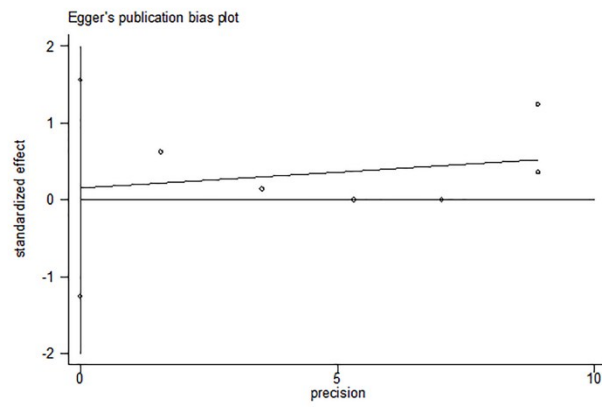

Fig. 4 The bias analysis of glycated hemoglobin in different n-6/n-3 PUFA ratios
