# Supplementary material for: Effect of low-ratio n-6/n-3 PUFA on blood glucose: a meta-analysis
Source: Royal Society of Chemistry journal article supplement (doi:10.1039/c9fo00323a), 2019-01-01
Supplement: c9fo00323a2.pdf [file c9fo00323a2.pdf]

Appendix 2

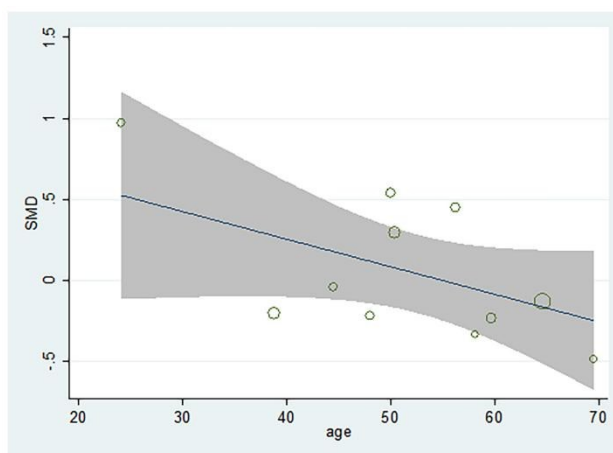

A: Regression analysis of age on fasting blood glucose

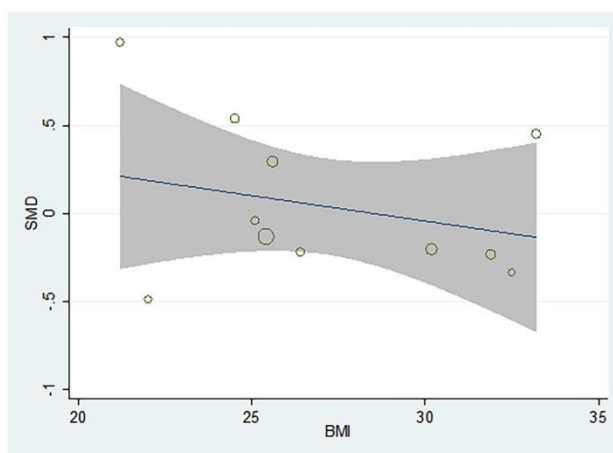

B: Regression analysis of BMI on fasting blood glucose

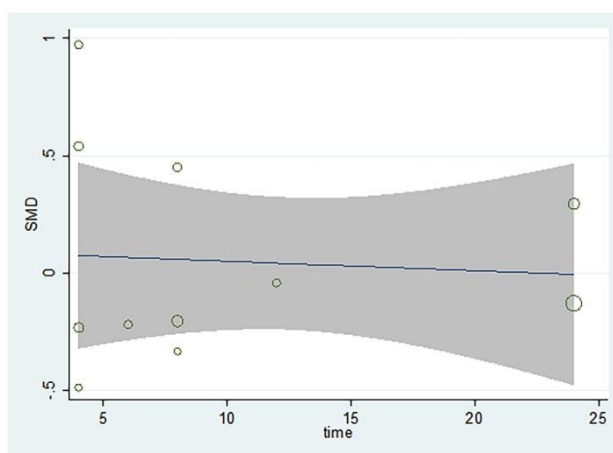

C: Regression analysis of intervention time on fasting blood glucose

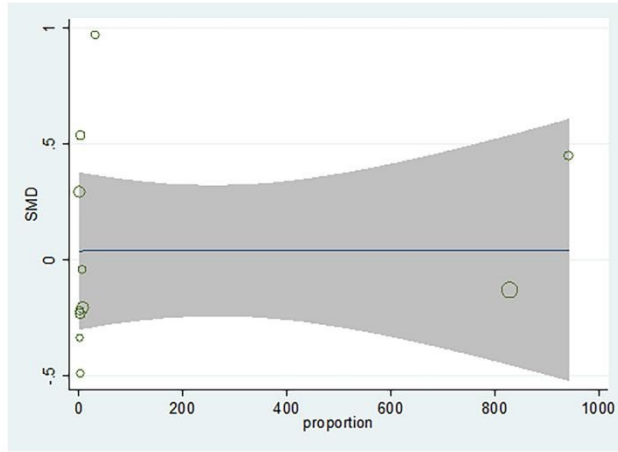

D: Regression analysis of proportion on fasting blood glucose

Fig. 1 meta-regression analyses of fasting blood glucose in different n-6/n-3 PUFA ratios

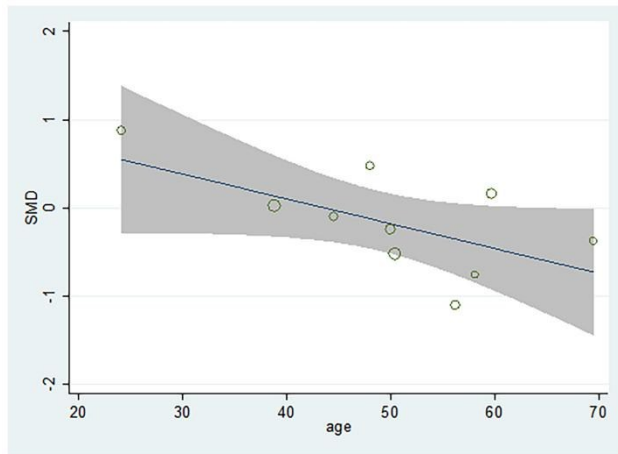

A: Regression analysis of age on fasting insulin

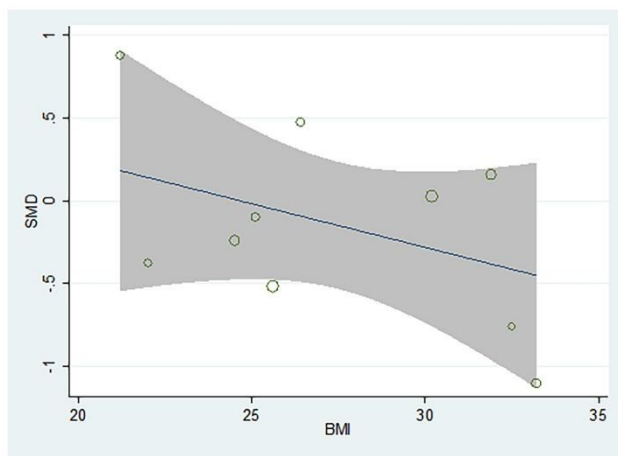

B: Regression analysis of BMI on fasting insulin

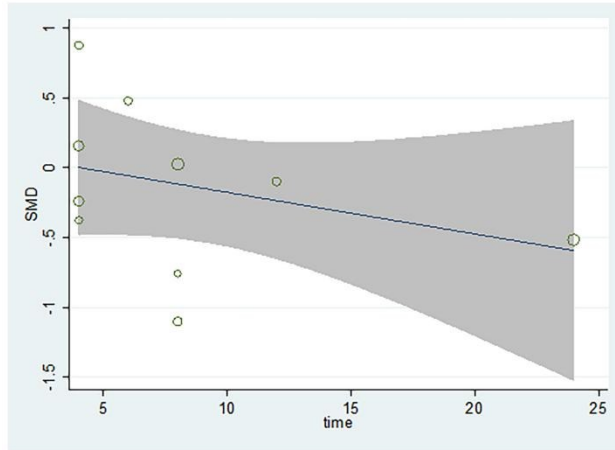

C: Regression analysis of intervention time on fasting insulin

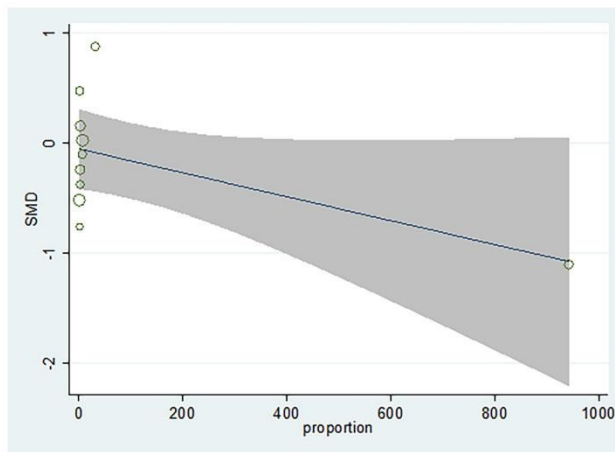

D: Regression analysis of proportion on fasting insulin

Fig. 2 meta-regression analyses of fasting insulin in different n-6/n-3 PUFA ratios  
 Proportion: n-6/n-3 PUFA ratio between the intervention group and the control group
