# Supplementary material for: Effect of low-ratio n-6/n-3 PUFA on blood glucose: a meta-analysis
Source: Royal Society of Chemistry journal article supplement (doi:10.1039/c9fo00323a), 2019-01-01
Supplement: c9fo00323a3.pdf [file c9fo00323a3.pdf]

Appendix 3

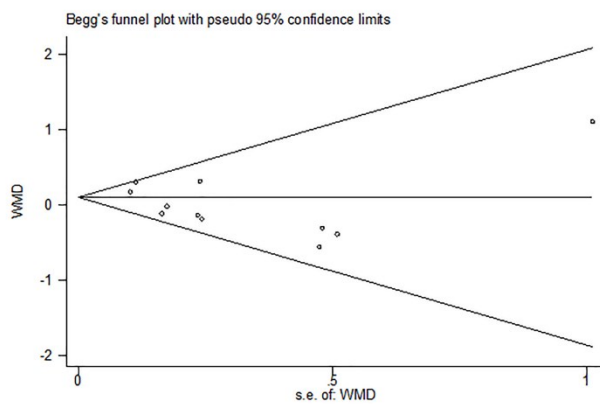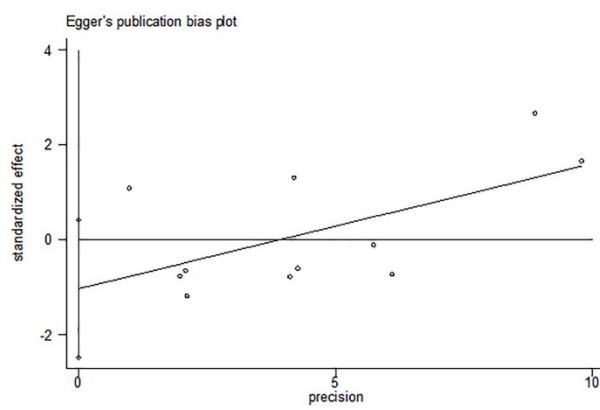

Fig. 1 The bias analysis of fasting glucose in different n-6/n-3 PUFA ratios

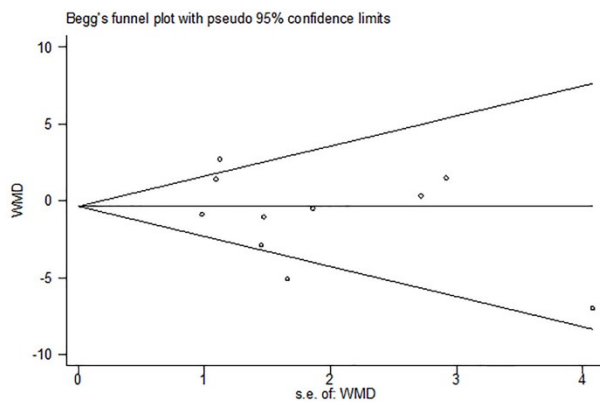

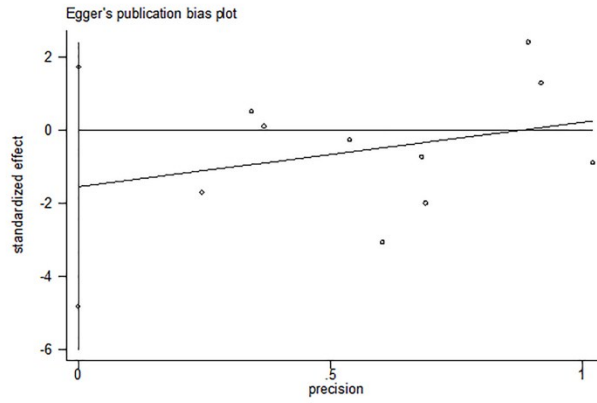

Fig. 2 The bias analysis of fasting insulin in different n-6/n-3 PUFA ratios

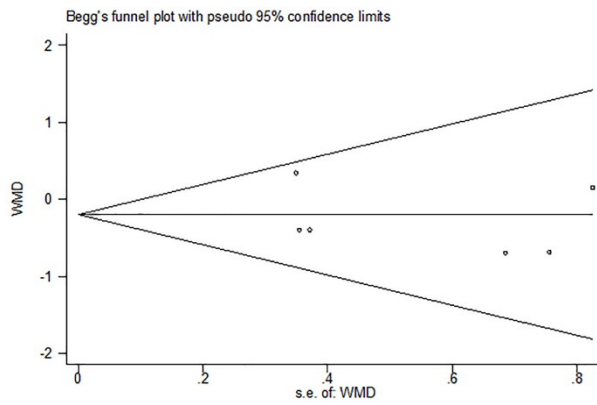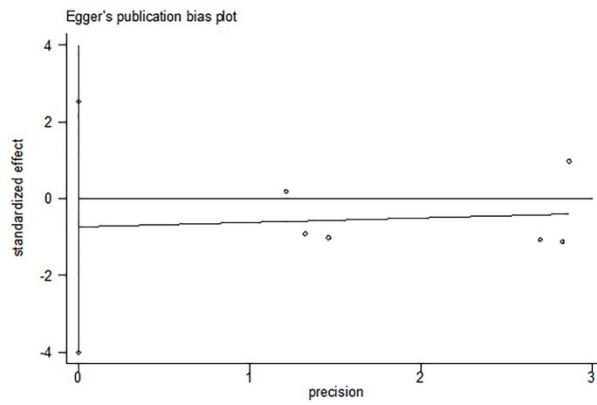

Fig. 3 The bias analysis of insulin resistance index in different n-6/n-3 PUFA ratios

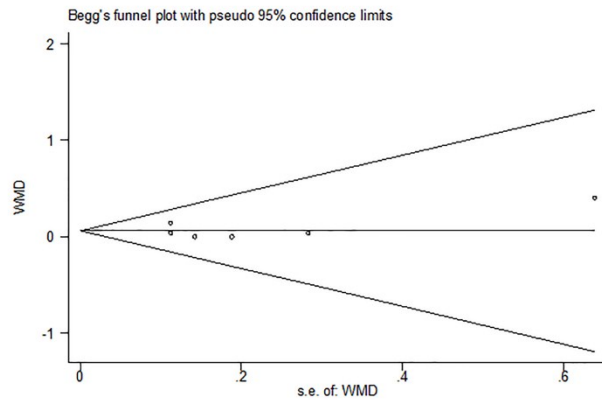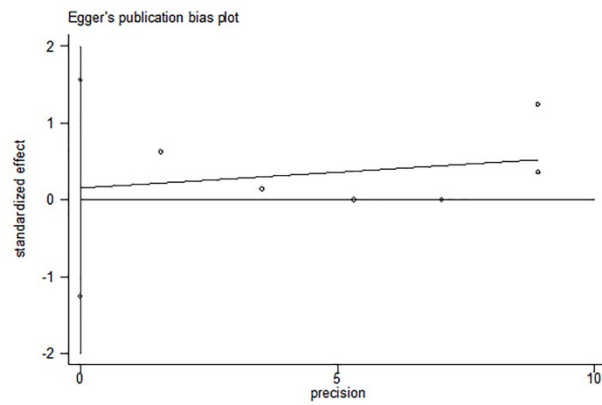

Fig. 4 The bias analysis of glyated hemoglobin in different n-6/n-3 PUFA ratios
